# Supplementary material for: Reversible Photocontrol of Dopaminergic Transmission in Wild-Type Animals
Source: Int J Mol Sci. 2022 Sep 4;23(17):10114. doi: 10.3390/ijms231710114 (PMC9456102; doi:10.3390/ijms231710114)
Supplement: Supplementary file 1 [file ijms-23-10114-s001.zip]

Archive with 4 entries (4 files):
- captions to Video S1 and Video S2.pdf
- supplementary materials.pdf
- Video S1.mov
- Video S2.mov
